# Supplementary material
Source: Springer Nature journal article supplement (https://www.springermedizin.de/resource/supplementary/12881_2013_1156_MOESM1_ESM.pdf/9452084)
Supplement: MOESM1 [file 9452084]

**Control**

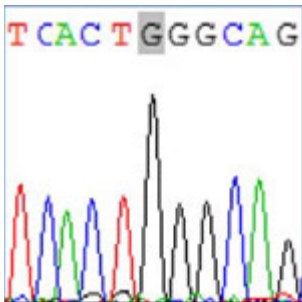

**Control**

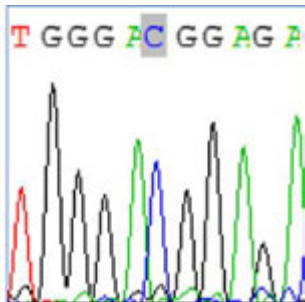

**Patient**

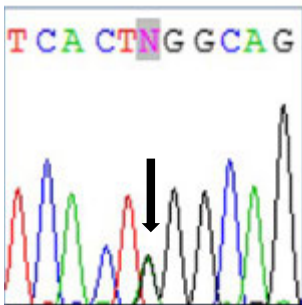

c.646G>A, p.Gly216Arg/GLUT9L  
c.559G>A, p.Gly187Arg/GLUT9S

**Patient**

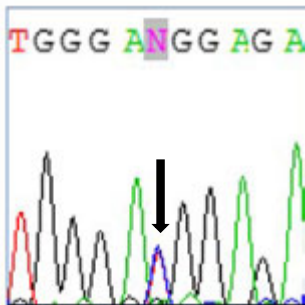

c.1138C>T, p.Arg380Trp/GLUT9L  
c.1051C>T, p.Arg351Trp/GLUT9S
